# Supplementary material
Source: HighWire-hosted journal article supplement (https://bmjopen.bmj.com/content/12/6/e062428)
Supplement: inline-supplementary-material-2 [file inline-supplementary-material-2.pdf]

**Supplement 2: Search strategy****OVID Medline Epub Ahead of Print, In-Process & Other Non-Indexed Citations, Ovid MEDLINE(R) Daily and Ovid MEDLINE(R) 1946 to Present**Search Strategy:  
-----

- 1 exp Drug Administration Schedule/
- 2 ad.fs.
- 3 "Duration of Therapy"/
- 4 (versus or vs).ti.
- 5 (?day or day or days).ti.
- 6 (extended or limited or shortened or short or long or longer or course or duration).ti,ab.
- 7 or/1-6
- 8 exp Pneumonia/
- 9 Respiratory Tract Infections/
- 10 Pneumonia, Pneumococcal/
- 11 Pleuropneumonia/
- 12 (pneumon\* or bronchopneumon\* or pleuropneumon\*) mp. [mp=title, abstract, original title, name of substance word, subject heading word, floating sub-heading word, keyword heading word, organism supplementary concept word, protocol supplementary concept word, rare disease supplementary concept word, unique identifier, synonyms]
- 13 (respiratory adj2 infection\*).mp.
- 14 or/8-13
- 15 exp Anti-Bacterial Agents/
- 16 (antimicrobial or antibiotic).mp. [mp=title, abstract, original title, name of substance word, subject heading word, floating sub-heading word, keyword heading word, organism supplementary concept word, protocol supplementary concept word, rare disease supplementary concept word, unique identifier, synonyms]
- 17 Tetracycline/ or tetracycline\*.mp. [mp=title, abstract, original title, name of substance word, subject heading word, floating sub-heading word, keyword heading word, organism supplementary concept word, protocol supplementary concept word, rare disease supplementary concept word, unique identifier, synonyms]
- 18 exp Lincosamides/ or lincosamide\*.mp. [mp=title, abstract, original title, name of substance word, subject heading word, floating sub-heading word, keyword heading word, organism supplementary concept word, protocol supplementary concept word, rare disease supplementary concept word, unique identifier, synonyms]
- 19 exp Macrolides/ or macrolide\*.mp.
- 20 Ketolides/ or Ketolide\*.mp.
- 21 exp Aminoglycosides/ or Aminoglycoside\*.mp.
- 22 exp Oxazolidinones/ or Oxazolidinone\*.mp.
- 23 exp Glycopeptides/ or Glycopeptide\*.mp.
- 24 exp beta-Lactams/ or Beta-lactam\*.mp.

- 25 exp Penicillins/ or Penicillin\*.mp.
- 26 Carbapenem\*.mp. or exp Carbapenems/
- 27 exp Cephalosporins/ or Cephalosporin\*.mp.
- 28 exp Monobactams/ or Monobactam\*.mp.
- 29 exp Folic Acid Antagonists/ or Antifolate\*.mp.
- 30 exp sulfonamide/ or Sulfonamide\*.mp.
- 31 exp Fluoroquinolones/ or Fluoroquinolone\*.mp.
- 32 (Piperacillin-tazobactam or Amoxicillin or Ampicillin or Ampicillin-sulbactam or Amoxicillin-clavulanate or Pivampicillin or Hetacillin or Bacampicillin or Metampicillin or Talampicillin or Epicillin or Carbenicillin or Ticarcillin or Temocillin or Ureidopenicillins or Azlocillin or Mezlocillin or Cyclacillin or Sulbenicillin or Aspoxicillin or Amdinocillin or Penicillin G Benzathine or Procaine benzylpenicillin or Azidocillin or Phenoxymethylpenicillin or Cloxacillin or Dicloxacillin or Flucloxacilli or Oxacillin or Meticillin or Nafcillin or Ampicillin-flucloxacillin or Sultamicillin or Ticarcillin-clavulanate).mp. [mp=title, abstract, original title, name of substance word, subject heading word, floating sub-heading word, keyword heading word, organism supplementary concept word, protocol supplementary concept word, rare disease supplementary concept word, unique identifier, synonyms]
- 33 (Aztreonam or Aztreonam-avibactam or Lefamulin).mp. [mp=title, abstract, original title, name of substance word, subject heading word, floating sub-heading word, keyword heading word, organism supplementary concept word, protocol supplementary concept word, rare disease supplementary concept word, unique identifier, synonyms]
- 34 (Cefepime or Ceftazidime or Cefotaxime or Ceftriaxone or Cefpodoxime or Cefuroxime or Ceftaroline or Ceftolozane-tazobactam or Ceftazidime-avibactam or Ceftaroline-avibactam or cefoperazone-sulbactam or Ceftobiprole medocaril or Ceftazidime-avibactam or Cefazolin or Cefacetrile or Cefadroxil or Cefalexin or Cephaloridine or Cefalotin or Cefatrizine or Cefazedone or Cefradine or Cefroxadine or Cefaclor or Cefamandole or Cefminox or Cefonicid or Ceforanide or Cefotiam or Cefprozil or Cefbuperazone or Cefuzonam or cephamycin or Cefoxitin or Cefotetan or Cefmetazole or Loracarbef or Cefixime or Cefoperazone or Cefcapene or Cefdinir or Cefditoren or Cefetamet or Cefmenoxime or Cefodizime or Cefpimizole or Cefpiramide or Cefpodoxime or Cefsulodin or Cefteram or Ceftibuten or Ceftizoxime or oxacephem or Flomoxef or Latamoxef or Moxalactam or Cefiderocol or Cefozopran or Cefpirome or Ceftobiprole or Ceftolozane or Carumonam or Nocardicin A).mp. [mp=title, abstract, original title, name of substance word, subject heading word, floating sub-heading word, keyword heading word, organism supplementary concept word, protocol supplementary concept word, rare disease supplementary concept word, unique identifier, synonyms]
- 35 (Imipenem or Meropenem or Ertapenem or Imipenem-relebactam or Meropenem-vaborbactam or Doripenem or Biapenem or Ertapenem or Panipenem).mp. [mp=title, abstract, original title, name of substance word, subject heading word, floating sub-heading word, keyword heading word, organism supplementary concept word, protocol supplementary concept word, rare disease supplementary concept word, unique identifier, synonyms]

- 36 (Levofloxacin or Ciprofloxacin or Moxifloxacin or Omadacycline or Lascufloxacin or Zabofloxacin or Gatifloxacin or Grepafloxacin or Trovafloxacin or Enoxacin or Fleroxacin or Lomefloxacin or Nadifloxacin or Ofloxacin or Norfloxacin or Pefloxacin or Rufloxacin or Balofloxacin or Pazufloxacin or Sparfloxacin or Temafloxacin or Tosufloxacin or Clinafloxacin or Garenoxacin or Sitafloxacin or Prulifloxacin or Nemonoxacin or Alatrofloxacin).mp. [mp=title, abstract, original title, name of substance word, subject heading word, floating sub-heading word, keyword heading word, organism supplementary concept word, protocol supplementary concept word, rare disease supplementary concept word, unique identifier, synonyms]
- 37 (Gentamicin or Amikacin or Tobramycin or Plazomicin or Streptomycin or Dihydrostreptomycin or Ribostamycin or Kanamycin or Arbekacin or Netilmicin or Sisomicin or Isepamicin or Verdamycin or Eperezolid or Bekanamycin or Dibekacin or Micronomicin).mp. [mp=title, abstract, original title, name of substance word, subject heading word, floating sub-heading word, keyword heading word, organism supplementary concept word, protocol supplementary concept word, rare disease supplementary concept word, unique identifier, synonyms]
- 38 (Vancomycin or Linezolid or Telavancin or Oritavancin or Teicoplanin or Dalbavancin or Daptomycin or Posizolid or Radezolid or Tedizolid or Ranbezolid).mp. [mp=title, abstract, original title, name of substance word, subject heading word, floating sub-heading word, keyword heading word, organism supplementary concept word, protocol supplementary concept word, rare disease supplementary concept word, unique identifier, synonyms]
- 39 (Azithromycin or Clarithromycin or Erythromycin or Nafithromycin or Dirithromycin or Flurithromycin or Josamycin or Midecamycin or Miocamycin or Rokitamycin).mp. [mp=title, abstract, original title, name of substance word, subject heading word, floating sub-heading word, keyword heading word, organism supplementary concept word, protocol supplementary concept word, rare disease supplementary concept word, unique identifier, synonyms]
- 40 (Doxycycline or Tigecycline or Chlortetracycline or Demeclocycline or Lymecycline or Meclocycline or Metacycline or Minocycline or Penimepicycline or Rolitetracycline or Eravacycline).mp. [mp=title, abstract, original title, name of substance word, subject heading word, floating sub-heading word, keyword heading word, organism supplementary concept word, protocol supplementary concept word, rare disease supplementary concept word, unique identifier, synonyms]
- 41 (Clindamycin or Solithromycin or Telithromycin or Cethromycin or Lincomycin or Roxithromycin or Spiramycin or Troleandomycin).mp. [mp=title, abstract, original title, name of substance word, subject heading word, floating sub-heading word, keyword heading word, organism supplementary concept word, protocol supplementary concept word, rare disease supplementary concept word, unique identifier, synonyms]
- 42 (Sulfamethizole or Sulfathiazole or Sulfapyridine or Prontosil or Sulfanilamide or Sulfadiazine or Sulfalene or Sulfamethoxazole or Sulfamerazine or Sulfametrole or Trimethoprim-sulfamethoxazole or sepra or cotrimoxazole or Sulfisoxazole or Sulfamethazine or Iclaprim or Brodimoprim).mp. [mp=title, abstract, original title, name of substance word, subject heading word, floating sub-heading word, keyword

heading word, organism supplementary concept word, protocol supplementary concept word, rare disease supplementary concept word, unique identifier, synonyms]

43 (Metronidazole or Tinidazole or Ornidazole).mp. [mp=title, abstract, original title, name of substance word, subject heading word, floating sub-heading word, keyword heading word, organism supplementary concept word, protocol supplementary concept word, rare disease supplementary concept word, unique identifier, synonyms]

44 (Streptogramin or Quinupristin-dalfopristin or Chloramphenicol or Fusidic acid or Fosfomycin or Murepavidin).mp. [mp=title, abstract, original title, name of substance word, subject heading word, floating sub-heading word, keyword heading word, organism supplementary concept word, protocol supplementary concept word, rare disease supplementary concept word, unique identifier, synonyms]

45 (Rifampicin or Rifabutin or Rifapentine).mp. [mp=title, abstract, original title, name of substance word, subject heading word, floating sub-heading word, keyword heading word, organism supplementary concept word, protocol supplementary concept word, rare disease supplementary concept word, unique identifier, synonyms]

46 or/15-45

47 7 and 14 and 46

48 randomized controlled trial.pt.

49 controlled clinical trial.pt.

50 random:.tw. or placebo:.mp. or double-blind:.tw.

51 ((treatment or control) adj3 group\*).ab.

52 (allocat\* adj5 group\*).ab.

53 ((clinical or control\*) adj3 trial).ti,ab,kw.

54 or/48-53

55 exp animals/ not humans.sh.

56 54 not 55

57 47 and 56

**EMBASE (OVID)**

## Search Strategy:

- 
- 1 drug dose/ or dosage schedule comparison/ or drug dose comparison/ or drug dose titration/ or optimal drug dose/
  - 2 treatment duration/
  - 3 cm.fs.
  - 4 ct.fs.
  - 5 cb.fs.
  - 6 (duration or course or extended or limited or shortened or shot or long or longer).ti,ab.
  - 7 (versus or vs).ti.
  - 8 (?day or day or days).ti.
  - 9 or/1-8
  - 10 \*pneumonia/
  - 11 pneumonia.ti.
  - 12 10 or 11
  - 13 9 and 12
  - 14 tetracycline/ or tetracycline\*.mp.
  - 15 lincosamide/ or lincosamide\*.mp.
  - 16 exp macrolide/ or macrolide\*.mp.
  - 17 exp ketolide/ or Ketolide\*.mp.
  - 18 aminoglycoside/ or Aminoglycoside\*.mp.
  - 19 oxazolidinone derivative/ or Oxazolidinone\*.mp.
  - 20 exp glycopeptide/ or Glycopeptide\*.mp.
  - 21 exp beta lactam antibiotic/ or Beta-lactam\*.mp.
  - 22 Penicillin\*.mp. or exp penicillin derivative/
  - 23 carbapenem derivative/ or Carbapenem\*.mp.
  - 24 exp cephalosporin derivative/ or Cephalosporin\*.mp.
  - 25 exp monobactam derivative/ or Monobactam\*.mp.
  - 26 exp folic acid antagonist/
  - 27 sulfonamide/ or Sulfonamide\*.mp.
  - 28 Fluoroquinolone\*.mp.
  - 29 (Piperacillin-tazobactam or Amoxicillin or Ampicillin or Ampicillin-sulbactam or Amoxicillin-clavulanate or Pivampicillin or Hetacillin or Bacampicillin or Metampicillin or Talampicillin or Epicillin or Carbenicillin or Ticarcillin or Temocillin or Ureidopenicillins or Azlocillin or Mezlocillin or Cyclacillin or Sulbenicillin or Aspoxicillin or Amdinocillin or Penicillin G Benzathine or Procaine benzylpenicillin or Azidocillin or Phenoxymethylpenicillin or Cloxacillin or Dicloxacillin or Flucloxacilli or Oxacillin or Meticillin or Nafcillin or Ampicillin-flucloxacillin or Sultamicillin or Ticarcillin-clavulanate).mp. [mp=title, abstract, heading word, drug trade name, original title, device manufacturer, drug manufacturer, device trade name, keyword heading word, floating subheading word, candidate term word]

- 30 (Aztreonam or Aztreonam-avibactam or Lefamulin).mp. [mp=title, abstract, heading word, drug trade name, original title, device manufacturer, drug manufacturer, device trade name, keyword heading word, floating subheading word, candidate term word]
- 31 (Cefepime or Ceftazidime or Cefotaxime or Ceftriaxone or Cefpodoxime or Cefuroxime or Ceftaroline or Ceftolozane-tazobactam or Ceftazidime-avibactam or Ceftaroline-avibactam or cefoperazone-sulbactam or Ceftobiprole medocaril or Ceftazidime-avibactam or Cefazolin or Cefacetrile or Cefadroxil or Cefalexin or Cephaloridine or Cefalotin or Cefatrizine or Cefazedone or Cefradine or Cefroxadine or Cefaclor or Cefamandole or Cefminox or Cefonicid or Ceforanide or Cefotiam or Cefprozil or Cefbuperazone or Cefuzonam or cephamycin or Cefoxitin or Cefotetan or Cefmetazole or Loracarbef or Cefixime or Cefoperazone or Cefcapene or Cefdinir or Cefditoren or Cefetamet or Cefmenoxime or Cefodizime or Cefpimizole or Cefpiramide or Cefpodoxime or Cefsulodin or Cefteram or Ceftibuten or Ceftizoxime or oxacephem or Flomoxef or Latamoxef or Moxalactam or Cefiderocol or Cefozopran or Cefpirome or Ceftobiprole or Ceftolozane or Carumonam or Nocardicin A).mp. [mp=title, abstract, heading word, drug trade name, original title, device manufacturer, drug manufacturer, device trade name, keyword heading word, floating subheading word, candidate term word]
- 32 (Imipenem or Meropenem or Ertapenem or Imipenem-relebactam or Meropenem-vaborbactam or Doripenem or Biapenem or Ertapenem or Panipenem).mp. [mp=title, abstract, heading word, drug trade name, original title, device manufacturer, drug manufacturer, device trade name, keyword heading word, floating subheading word, candidate term word]
- 33 (levofloxacin or Ciprofloxacin or Moxifloxacin Omadacycline or Lascufloxacin or Zabofloxacin or Gatifloxacin or Grepafloxacin or Trovafloxacin or Enoxacin or Fleroxacin or Lomefloxacin or Nadifloxacin or Ofloxacin or Norfloxacin or Pefloxacin or Rufloxacin or Balofloxacin or Pazufloxacin or Sparfloxacin or Temafloxacin or Tosufloxacin or Clinafloxacin or Garenoxacin or Sitafoxacin or Prulifloxacin or Nemonoxacin or Alatrofloxacin).mp. [mp=title, abstract, heading word, drug trade name, original title, device manufacturer, drug manufacturer, device trade name, keyword heading word, floating subheading word, candidate term word]
- 34 (Gentamicin or Amikacin or Tobramycin or Plazomicin or Streptomycin or Dihydrostreptomycin or Ribostamycin or Kanamycin or Arbekacin or Netilmicin or Sisomicin or Isepamicin or Verdamycin or Eperezolid or Bekanamycin or Dibekacin or Micronomicin).mp. [mp=title, abstract, heading word, drug trade name, original title, device manufacturer, drug manufacturer, device trade name, keyword heading word, floating subheading word, candidate term word]
- 35 (Vancomycin or Linezolid or Telavancin or Oritavancin or Teicoplanin or Dalbavancin or Daptomycin or Posizolid or Radezolid or Tedizolid or Ranbezolid).mp. [mp=title, abstract, heading word, drug trade name, original title, device manufacturer, drug manufacturer, device trade name, keyword heading word, floating subheading word, candidate term word]
- 36 (Azithromycin or Clarithromycin or Erythromycin or Nafithromycin or Dirithromycin or Flurithromycin or Josamycin or Midecamycin or Miocamycin or Rokitamycin).mp. [mp=title, abstract, heading word, drug trade name, original title,

device manufacturer, drug manufacturer, device trade name, keyword heading word, floating subheading word, candidate term word]

37 (Doxycycline or Tigecycline or Chlortetracycline or Demeclocycline or Lymecycline or Meclocycline or Metacycline or Minocycline or Penimepicycline or Rolitetracycline or Eravacycline).mp. [mp=title, abstract, heading word, drug trade name, original title, device manufacturer, drug manufacturer, device trade name, keyword heading word, floating subheading word, candidate term word]

38 (Clindamycin or Solithromycin or Telithromycin or Cethromycin or Lincomycin or Roxithromycin or Spiramycin or Troleandomycin).mp. [mp=title, abstract, heading word, drug trade name, original title, device manufacturer, drug manufacturer, device trade name, keyword heading word, floating subheading word, candidate term word]

39 (Sulfamethizole or Sulfathiazole or Sulfapyridine or Prontosil or Sulfanilamide or Sulfadiazine or Sulfalene or Sulfamethoxazole or Sulfamerazine or Sulfametrole or Trimethoprim-sulfamethoxazole or septrax or cotrimoxazole or Sulfisoxazole or Sulfamethazine or Iclaprim or Brodimoprim).mp. [mp=title, abstract, heading word, drug trade name, original title, device manufacturer, drug manufacturer, device trade name, keyword heading word, floating subheading word, candidate term word]

40 (Metronidazole or Tinidazole or Ornidazole).mp. [mp=title, abstract, heading word, drug trade name, original title, device manufacturer, drug manufacturer, device trade name, keyword heading word, floating subheading word, candidate term word]

41 (Streptogramin or Quinupristin-dalfopristin or Chloramphenicol or Fusidic acid or Fosfomycin or Murepavidin).mp. [mp=title, abstract, heading word, drug trade name, original title, device manufacturer, drug manufacturer, device trade name, keyword heading word, floating subheading word, candidate term word]

42 (Rifampicin or Rifabutin or Rifapentine).mp. [mp=title, abstract, heading word, drug trade name, original title, device manufacturer, drug manufacturer, device trade name, keyword heading word, floating subheading word, candidate term word]

43 (antibiotic or anti biotic or antimicrobial).mp.

44 exp antibiotic agent/

45 or/14-44

46 13 and 45

47 randomized controlled trial/

48 Controlled clinical study/

49 random\$.ti,ab.

50 randomization/

51 intermethod comparison/

52 placebo.ti,ab.

53 (compare or compared or comparison).ti.

54 ((evaluated or evaluate or evaluating or assessed or assess) and (compare or compared or comparing or comparison)).ab.

55 (open adj label).ti,ab.

56 ((double or single or doubly or singly) adj (blind or blinded or blindly)).ti,ab.

- 57 double blind procedure/  
58 parallel group\$1.ti,ab.  
59 (crossover or cross over).ti,ab.  
60 ((assign\$ or match or matched or allocation) adj5 (alternate or group\$1 or intervention\$1 or patient\$1 or subject\$1 or participant\$1)).ti,ab.  
61 (assigned or allocated).ti,ab.  
62 (controlled adj7 (study or design or trial)).ti,ab.  
63 (volunteer or volunteers).ti,ab.  
64 human experiment/  
65 trial.ti.  
66 or/47-65  
67 (random\$ adj sampl\$ adj7 ("cross section\$" or questionnaire\$1 or survey\$ or database\$1)).ti,ab. not (comparative study/ or controlled study/ or randomi?ed controlled.ti,ab. or randomly assigned.ti,ab.)  
68 Cross-sectional study/ not (randomized controlled trial/ or controlled clinical study/ or controlled study/ or randomi?ed controlled.ti,ab. or control group\$1.ti,ab.)  
69 (((case adj control\$) and random\$) not randomi?ed controlled).ti,ab.  
70 (Systematic review not (trial or study)).ti.  
71 (nonrandom\$ not random\$).ti,ab.  
72 "Random field\$".ti,ab.  
73 (random cluster adj3 sampl\$).ti,ab.  
74 (review.ab. and review.pt.) not trial.ti.  
75 "we searched".ab. and (review.ti. or review.pt.)  
76 "update review".ab.  
77 (databases adj4 searched).ab.  
78 (rat or rats or mouse or mice or swine or porcine or murine or sheep or lambs or pigs or piglets or rabbit or rabbits or cat or cats or dog or dogs or cattle or bovine or monkey or monkeys or trout or marmoset\$1).ti. and animal experiment/  
79 Animal experiment/ not (human experiment/ or human/  
80 or/67-79  
81 66 not 80  
82 46 and 81



**CINAHL**

| #   | Query                                                                                                               |
|-----|---------------------------------------------------------------------------------------------------------------------|
| S47 | S30 AND S46                                                                                                         |
| S46 | S31 OR S32 OR S33 OR S34 OR S35 OR S36 OR S37 OR S38 OR S39 OR S40 OR S41 OR S42 OR S43 OR S44 OR S45               |
| S45 | AB (CLUSTER W3 RCT)                                                                                                 |
| S44 | MH (CROSSOVER DESIGN) OR MH (COMPARATIVE STUDIES)                                                                   |
| S43 | AB (CONTROL W5 GROUP)                                                                                               |
| S42 | PT (randomized controlled trial)                                                                                    |
| S41 | MH (placebos)                                                                                                       |
| S40 | MH (sample size) AND AB (assigned OR allocated OR control)                                                          |
| S39 | TI (trial)                                                                                                          |
| S38 | AB (random*)                                                                                                        |
| S37 | TI (randomised OR randomized)                                                                                       |
| S36 | MH cluster sample                                                                                                   |
| S35 | MH pretest-posttest design                                                                                          |
| S34 | MH random assignment                                                                                                |
| S33 | MH single-blind studies                                                                                             |
| S32 | MH double-blind studies                                                                                             |
| S31 | MH randomized controlled trials                                                                                     |
| S30 | S11 AND S29                                                                                                         |
| S29 | S12 OR S13 OR S14 OR S15 OR S16 OR S17 OR S18 OR S19 OR S20 OR S21 OR S22 OR S23 OR S24 OR S25 OR S26 OR S27 OR S28 |
| S28 | TI Rifampicin or Rifabutin or Rifapentine                                                                           |
| S27 | TX Streptogramin or Quinupristin-dalfopristin or Chloramphenicol or Fusidic acid or Fosfomycin or Murepavidin       |
| S26 | TI Metronidazole or Tinidazole or Ornidazole                                                                        |
| S25 | TX Sulfamethizole or Sulfathiazole or Sulfapyridine or Prontosil or Sulfanilamide or Sulfadiazine or Sulfalene or   |

- S24 Sulfamethoxazole or Sulfamerazine or Sulfametrole or Trimethoprim-sulfamethoxazole or septrax or cotrimoxazole or Sulfisoxazole or Sulfamethazine or Iclaprim or Brodimoprim
- S24 TX Clindamycin or Solithromycin or Telithromycin or Cethromycin or Lincomycin or Roxithromycin or Spiramycin or Troleandomycin
- S23 TX Doxycycline or Tigecycline or Chlortetracycline or Demeclocycline or Lymecycline or Meclocycline or Metacycline or Minocycline or Penimepicycline or Rolitetracycline or Eravacycline
- S22 TX Azithromycin or Clarithromycin or Erythromycin or Nafithromycin or Dirithromycin or Flurithromycin or Josamycin or Midecamycin or Miocamycin or Rokitamycin
- S21 TX Vancomycin or Linezolid or Telavancin or Oritavancin or Teicoplanin or Dalbavancin or Daptomycin or Posizolid or Radezolid or Tedizolid or Ranbezolid
- S20 TX Gentamicin or Amikacin or Tobramycin or Plazomicin or Streptomycin or Dihydrostreptomycin or Ribostamycin or Kanamycin or Arbekacin or Netilmicin or Sisomicin or Isepamicin or Verdamicin or Eperezolid or Bekanamycin or Dibekacin or Micronomicin
- S19 TX levofloxacin or Ciprofloxacin or Moxifloxacin or Omadacycline or Lascufloxacin or Zabofloxacin or Gatifloxacin or Grepafloxacin or Trovafloxacin or Enoxacin or Fleroxacin or Lomefloxacin or Nadifloxacin or Ofloxacin or Norfloxacin or Pefloxacin or Rufloxacin or Balofloxacin or Pazufloxacin or Sparfloxacin or Temafloxacin or Tosufloxacin or Clinafloxacin or Garenoxacin or Sitafoxacin or Prulifloxacin or Nemonoxacin or Alatrofloxacin
- S18 TX Imipenem or Meropenem or Ertapenem or Imipenem-relebactam or Meropenem-vaborbactam or Doripenem or Biapenem or Ertapenem or Panipenem
- S17 TX Cefepime or Ceftazidime or Cefotaxime or Ceftriaxone or Cefpodoxime or Cefuroxime or Ceftaroline or Ceftolozane-tazobactam or Ceftazidime-avibactam or Ceftaroline-avibactam or cefoperazone-sulbactam or Ceftobiprole medocaril or Ceftazidime-avibactam or Cefazolin or Cefacetile or Cefadroxil or Cefalexin or Cephaloridine or Cefalotin or Cefatrizine or Cefazedone or Cefradine or Cefroxadine or Cefaclor or Cefamandole or Cefminox or Cefonicid or Ceforanide or Cefotiam or Cefprozil or Cefbuperazone or Cefuzonam or cephamycin or Cefoxitin or Cefotetan or Cefmetazole or Loracarbef or Cefixime or Cefoperazone or Cefcapene or Cefdinir or Cefditoren or Cefetamet or Cefmenoxime or Cefodizime or Cefpimizole or Cefpiramide or Cefpodoxime or Cefsulodin

- or Cefteram or Ceftibuten or Ceftizoxime or oxacephem or Flomoxef or Latamoxef or Moxalactam or Cefiderocol or Cefozopran or Cefpirome or Ceftobiprole or Ceftolozane or Carumonam or Nocardicin A
- S16 TX Aztreonam or Aztreonam-avibactam or Lefamulin
- S15 TX Piperacillin-tazobactam or Amoxicillin or Ampicillin or Ampicillin-sulbactam or Amoxicillin-clavulanate or Pivampicillin or Hetacillin or Bacampicillin or Metampicillin or Talampicillin or Epicillin or Carbenicillin or Ticarcillin or Temocillin or Ureidopenicillins or Azlocillin or Mezlocillin or Cyclacillin or Sulbenicillin or Aspoxicillin or Amdinocillin or Penicillin G Benzathine or Procaine benzylpenicillin or Azidocillin or Phenoxymethylpenicillin or Cloxacillin or Dicloxacillin or Flucloxacilli or Oxacillin or Meticillin or Nafcillin or Ampicillin-flucloxacillin or Sultamicillin or Ticarcillin-clavulanate
- S14 TX tetracycline or lincosamide or macrolide or Ketolide\* or Aminoglycoside\* or Oxazolidinone\* or Glycopeptide or Beta-lactam\* or Penicillin\* or Carbapenem\* or Cephalosporin\* or Monobactam\* or Folic Acid Antagonists\* or Antifolate\* or Sulfonamide\* or Fluoroquinolone\*
- S13 TI ( antibiotic or anti biotic or antimicrobial ) OR TI ( antibiotic or anti biotic or antimicrobial )
- S12 (MH "Antibiotics+")
- S11 S6 AND S10
- S10 S7 OR S8 OR S9
- S9 TI ( pneumon\* or bronchopneumon\* or pleuropneumon\* ) OR AB ( pneumon\* or bronchopneumon\* or pleuropneumon\* )
- S8 (MH "Respiratory Tract Infections")
- S7 (MH "Pneumonia+")
- S6 S1 OR S2 OR S3 OR S4 OR S5
- S5 TI day or days
- S4 TI versus or vs
- S3 TI ( duration or course or extended or limited or shortened or shot or long or longer ) OR AB ( duration or course or extended or limited or shortened or shot or long or longer )
- S2 (MH "Treatment Duration")
- S1 (MH "Drug Administration Schedule")

### Cochrane Library

- ID Search Hits
- #1 MeSH descriptor: [Drug Administration Schedule] explode all trees
  - #2 MeSH descriptor: [Duration of Therapy] explode all trees
  - #3 (versus or vs):ti (Word variations have been searched)
  - #4 (day or days):ti (Word variations have been searched)
  - #5 (extended or limited or shortened or short or long or longer or course or duration):ti,ab,kw (Word variations have been searched)
  - #6 #1 or #2 or #3 or #4 or #5
  - #7 MeSH descriptor: [Pneumonia] explode all trees
  - #8 MeSH descriptor: [Respiratory Tract Infections] this term only
  - #9 MeSH descriptor: [Pneumonia, Pneumococcal] explode all trees
  - #10 MeSH descriptor: [Pleuropneumonia] explode all trees
  - #11 (pneumon\* or bronchopneumon\* or pleuropneumon\*):ti,ab,kw (Word variations have been searched)
  - #12 respiratory near/2 infection\*
  - #13 #7 or #8 or #9 or #10 or #11 or #12
  - #14 #6 and #13
  - #15 MeSH descriptor: [Anti-Bacterial Agents] explode all trees
  - #16 (antibiotic or anti biotic or antimicrobial):ti,ab,kw (Word variations have been searched)
  - #17 tetracycline or lincosamide or macrolide or Ketolide\* or Aminoglycoside\* or Oxazolidinone\* or Glycopeptide or Beta-lactam\* or Penicillin\* or Carbapenem\* or Cephalosporin\* or Monobactam\* or Folic Acid Antagonists or Antifolate\* or Sulfonamide\* or Fluoroquinolone\*
  - #18 Piperacillin-tazobactam or Amoxicillin or Ampicillin or Ampicillin-sulbactam or Amoxicillin-clavulanate or Pivampicillin or Hetacillin or Bacampicillin or Metampicillin or Talampicillin or Epicillin or Carbenicillin or Ticarcillin or Temocillin or Ureidopenicillins or Azlocillin or Mezlocillin or Cyclacillin or Sulbenicillin or Aspoxicillin or Amdinocillin or Penicillin G Benzathine or Procaine benzylpenicillin or Azidocillin or Phenoxymethylpenicillin or Cloxacillin or Dicloxacillin or Flucloxacilli or Oxacillin or Meticillin or Nafcillin or Ampicillin-flucloxacillin or Sultamicillin or Ticarcillin-clavulanate
  - #19 Aztreonam or Aztreonam-avibactam or Lefamulin
  - #20 Cefepime or Ceftazidime or Cefotaxime or Ceftriaxone or Cefpodoxime or Cefuroxime or Ceftaroline or Ceftolozane-tazobactam or Ceftazidime-avibactam or Ceftaroline-avibactam or cefoperazone-sulbactam or Ceftriboprole medocaril or Ceftazidime-avibactam or Cefazolin or Cefacetrile or Cefadroxil or Cefalexin or Cephaloridine or Cefalotin or Cefatrizine or Cefazedone or Cefradine or Cefroxadine or Cefaclor or Cefamandole or Cefminox or Cefonicid or Ceforanide or Cefotiam or Cefprozil or Cefbuperazone or Cefuzonam or cephamycin or Cefoxitin or Cefotetan or Cefmetazole or Loracarbef or Cefixime or Cefoperazone or Cefcapene or Cefdinir or Cefditoren or Cefetamet or Cefmenoxime or Cefodizime or Cefpimizole or Cefpiramide or Cefpodoxime or Cefsulodin or Cefteram or Cefbuten or Ceftizoxime or oxacephem or Flomoxef or Latamoxef or Moxalactam or Cefiderocol or

Cefozopran or Cefpirome or Ceftobiprole or Ceftolozane or Carumonam or Nocardicin A

#21 Imipenem or Meropenem or Ertapenem or Imipenem-relebactam or Meropenem-vaborbactam or Doripenem or Biapenem or Ertapenem or Panipenem

#22 levofloxacin or Ciprofloxacin or Moxifloxacin Omadacycline or Lascufloxacin or Zabofloxacin or Gatifloxacin or Grepafloxacin or Trovafloxacin or Enoxacin or Fleroxacin or Lomefloxacin or Nadifloxacin or Ofloxacin or Norfloxacin or Pefloxacin or Rufloxacin or Balofloxacin or Pazufloxacin or Sparfloxacin or Temafloxacin or Tosufloxacin or Clinafloxacin or Garenoxacin or Sitafoxacin or Prulifloxacin or Nemonoxacin or Alatrofloxacin

#23 Gentamicin or Amikacin or Tobramycin or Plazomicin or Streptomycin or Dihydrostreptomycin or Ribostamycin or Kanamycin or Arbekacin or Netilmicin or Sisomicin or Isepamicin or Verdamicin or Eperezolid or Bekanamycin or Dibekacin or Micronomicin

#24 Vancomycin or Linezolid or Telavancin or Oritavancin or Teicoplanin or Dalbavancin or Daptomycin or Posizolid or Radezolid or Tedizolid or Ranbezolid

#25 Azithromycin or Clarithromycin or Erythromycin or Nafithromycin or Dirithromycin or Flurithromycin or Josamycin or Midecamycin or Miocamycin or Rokitamycin

#26 Doxycycline or Tigecycline or Chlortetracycline or Demeclocycline or Lymecycline or Meclocycline or Metacycline or Minocycline or Penimepicycline or Rolitetracycline or Eravacycline

#27 Clindamycin or Solithromycin or Telithromycin or Cethromycin or Lincomycin or Roxithromycin or Spiramycin or Troleandomycin

#28 Sulfamethizole or Sulfathiazole or Sulfapyridine or Prontosil or Sulfanilamide or Sulfadiazine or Sulfalene or Sulfamethoxazole or Sulfamerazine or Sulfametrole or Trimethoprim-sulfamethoxazole or sepra or cotrimoxazole or Sulfisoxazole or Sulfamethazine or Iclaprim or Brodimoprim

#29 Metronidazole or Tinidazole or Ornidazole

#30 Streptogramin or Quinupristin-dalfopristin or Chloramphenicol or Fusidic acid or Fosfomycin or Murepavidin

#31 Rifampicin or Rifabutin or Rifapentine

#32 #15 or #16 or #17 or #18 or #19 or #20 or #21 or #22 or #23 or #24 or #25 or #26 or #27 or #28 or #29 or #30 or #31

#33 #14 and #32 in Trials
